# Supplementary material for: Insight into the Effect of Oxygen Vacancy Prepared by Different Methods on CuO/Anatase Catalyst for CO Catalytic Oxidation
Source: MDPI journal article supplement (doi:10.3390/catal13010070), 2022-12-30
Supplement: s1 [file s1]

# Insight into the Effect of Oxygen Vacancy Prepared by Different Methods on CuO/Anatase Catalyst for CO Catalytic Oxidation

Wei Chen, Huan Shen, Xiaoxiao Zhu, Guoli Liu, Chuanqi Pan, Fajun Huang, Yarong Fang, Yanbing Guo and Zhu Luo \*

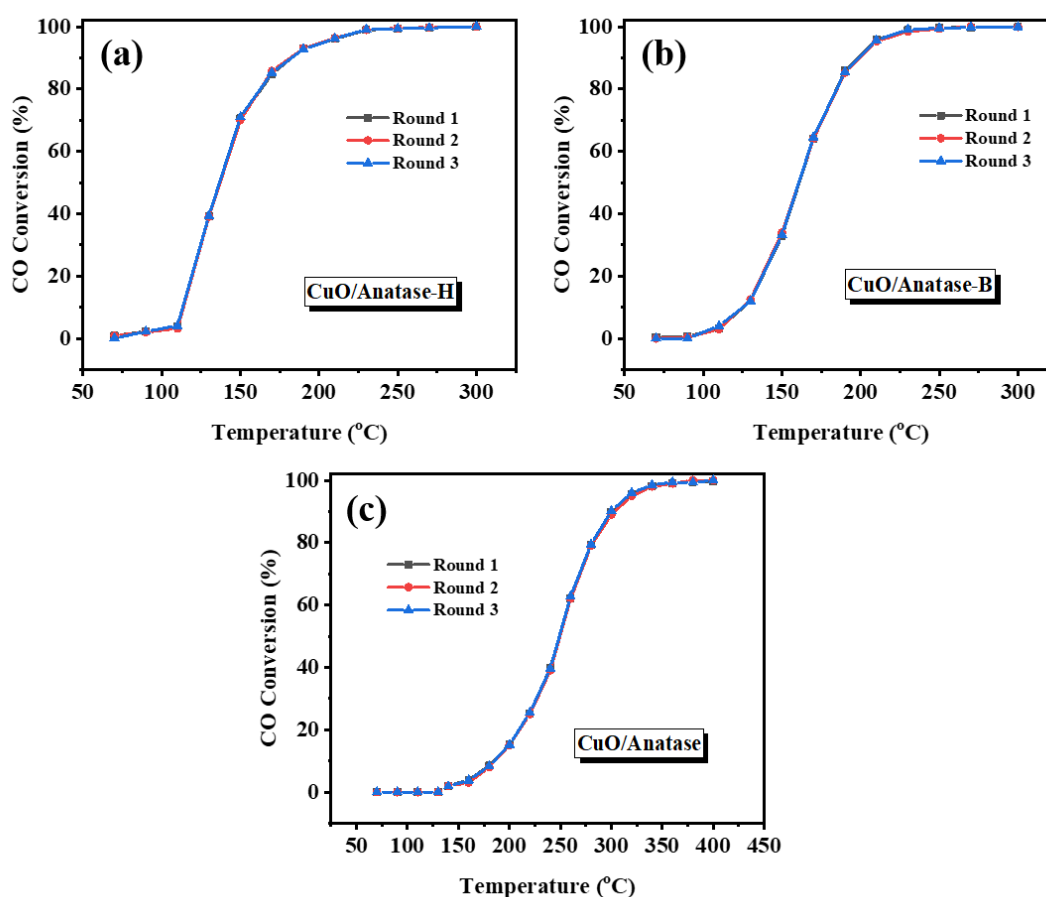

**Figure S1.** The CO oxidation performance of catalysts.

As shown in **Figure S1**, after three rounds of CO catalytic oxidation performance test, the activities of all catalysts are almost the same as round 1, indicating the catalysts are stable after several cycles.

**Table S1.** Comparison of the catalytic performance between the CuO/Anatase catalyst and the present catalysts

| <b>Catalysts</b>                                        | <b>BET surface area (m<sup>2</sup>/g)</b> | <b>T<sub>50</sub></b> | <b>T<sub>90</sub></b> | <b>GHSV (h<sup>-1</sup>)</b> | <b>References</b>                               |
|---------------------------------------------------------|-------------------------------------------|-----------------------|-----------------------|------------------------------|-------------------------------------------------|
| <b>CuO/Anatase</b>                                      | 31.7                                      | 248                   | 300                   | 60000                        | This work                                       |
| <b>CuO/Anatase-B</b>                                    | 33.5                                      | 160                   | 198                   | 60000                        | This work                                       |
| <b>CuO/Anatase-H</b>                                    | 33.0                                      | 135                   | 182                   | 60000                        | This work                                       |
| <b>Cu/TiO<sub>2</sub></b>                               | 69.2                                      | 125                   | 150                   | 60000                        | Catal. Sci. Technol. 2020, 10, 1661-1674        |
| <b>CuO NPs</b>                                          | -                                         | -                     | 180                   | 72000                        | ACS Appl. Mater. Interfaces, 2017, 9, 2495-2499 |
| <b>CuO-Co<sub>2</sub>O<sub>3</sub>-CeO<sub>2</sub>)</b> | 41.7                                      | -                     | 200                   | 150000                       | Angew. Chem. Int. Ed. 2015, 54,13263-13267      |
| <b>CuCe</b>                                             | 48.0                                      | 103                   | 140                   | 60000                        | Nanoscale, 2018,10, 22775-22786                 |

As shown in **Table S1**, the CO catalytic oxidation performance of the CuO/Anatase-H catalyst is comparable to other Cu-based catalysts.
